# Supplementary material for: Enhanced arsenite immobilization via ternary layered double hydroxides and application to paddy soil remediation
Source: Royal Society of Chemistry journal article supplement (doi:10.1039/c6ra28116h), 2017-01-01
Supplement: c6ra28116h1.pdf [file c6ra28116h1.pdf]

Table S1. Components of soil with As contamination via XRF.

| Components                     | Mass (%) |
|--------------------------------|----------|
| SiO <sub>2</sub>               | 61.69    |
| Al <sub>2</sub> O <sub>3</sub> | 14.72    |
| CaO                            | 12.20    |
| Fe <sub>2</sub> O <sub>3</sub> | 5.67     |
| K <sub>2</sub> O               | 2.33     |
| TiO <sub>2</sub>               | 1.32     |
| MgO                            | 1.02     |
| SO <sub>3</sub>                | 0.32     |
| P <sub>2</sub> O <sub>5</sub>  | 0.31     |
| Na <sub>2</sub> O              | 0.24     |
| MnO                            | 0.05     |
| Cr <sub>2</sub> O <sub>3</sub> | 0.04     |
| ZrO <sub>2</sub>               | 0.03     |
| ZnO                            | 0.02     |
| Co <sub>2</sub> O <sub>3</sub> | 0.02     |
| SrO                            | 0.01     |
| Rb <sub>2</sub> O              | 0.01     |

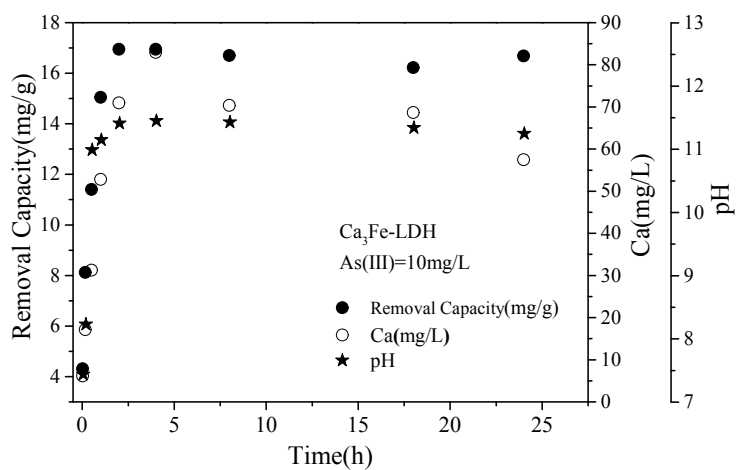

Figure S1. The removal of As(III), Ca concentration and pH in solution by Ca binary LDH.

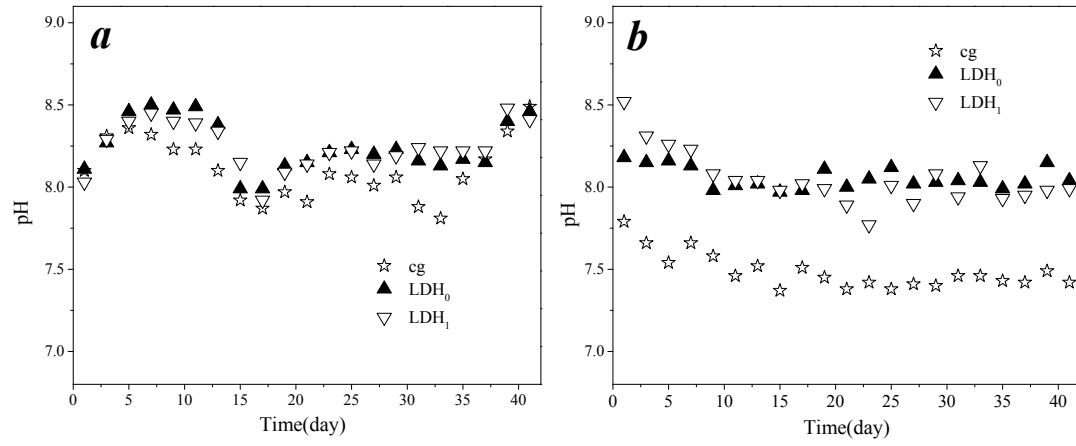

Figure S2. pH value in (a) surface water, (b) pore water.
